## ***Literature Review Interventions to Anticipate Catheter-Related Urinary Tract Contaminations in Seriously Care Units: Philosophy of Nursing***

Sri Rusmini<sup>1\*</sup>, Moses Glorino Rumambo Pandin<sup>2</sup>

<sup>1</sup>Doctoral Program Student from The Faculty of Nursing, Universitas Airlangga, Jalan Dr.Ir.H.Soekarno, Mulyorejo,

Kec. Mulyorejo, Surabaya, East Java 60115

<sup>2</sup>Faculty of Humanities Universitas Airlangga, Jalan Dr. Ir. H. Soekarno, Mulyorejo, Kec. Mulyorejo,

### **ABSTRACT**

**Background:** Urinary tract infections are among the adverse outcomes of urinary catheter placement. After the installation of a catheter, urinary tract infections happen more often than twice a day. Examining prevention strategies for UTIs in critical care units is the aim of this writing audit.

**Method:** Use ProQuest, Scopus, and ScienceDirect to look up review literature. Urinary tract infections, prevention and management, and intensive care unit were the search terms used to find publications. Search parameters for full-text, open-access, English-language papers published between 2019 and 2023.

**Results:** The study's findings indicate that adherence to patient information recording, installation and maintenance procedures, guidelines for the detection and prevention of CAUTI, staff education and good nursing practices, and the application of CAUTI prevention can all help lower the incidence of urinary tract infections.

**Conclusion:** Healthcare facilities need to have a program in place to avoid urinary tract infections brought on by catheter installation, as well as the best care possible for patients who use them. In order to solve the problem, all interdisciplinary teams must collaborate and analyze the issue using the PDSA methodology.

**Keyword:** *Urinary Tract Infections, ICU*

## **Introduction**

Urinary catheters are used in critically ill patients to monitor their fluid balance. According to Leon et al (Leone et al., 2004).CAUTI may have a significant role in the increased severity, mortality, expenses, and length of stay in the clinic. Cystitis is a common sign of urinary tract infections, which are often caused by Staphylococcus and E. coli in the urine sample (Birgitta Hovelius, 1984). Urinary tract infection symptoms are easily identifiable and typically include fever (F.M.E. Wagenlehner, E. Loibl, H. Vogel, 2006).

A urinary tract disease is an impairment that affects the kidneys, ureters, bladder, and urethra, as well as other components of the urinary system. 75% of nosocomial infections are typically associated with urinary catheter use. Urinary catheters can be inserted in as many as 15–25% of hospitalized patients during their stay. Long-term use of a urinary catheter is one risk factor associated with catheter configuration. According to the Centers for Disease Control and Prevention (2015), it should be used as if it were coordinated and eliminated when not needed.

By reducing unnecessary catheter use, shortening catheter use times, and advancing addition techniques, urinary tract disorders can be predicted. Urinary tract infections can be reduced by healthcare professionals, and interventions that target their behaviors are essential for optimal understanding and treatment (Wanat et al., 2020). The evaluation, mediation, prediction, and control rate of urinary tract disorders in critically ill units is the motivation behind this writing survey.

## **Method**

In order to predict and manage urinary tract infections in critical care units, this study used a writing audit approach. His publication period from 2019 to 2023 is one of the publication requirements. This article makes use of full text and original research. When searching the literature with ProQuest, ScienceDirect, and Scopus, The terms "urine tract infections," "prevention and control," and "intensive care units" were used in the literature search. After looking through the 736 publications that the keyword search produced, we looked through the inclusion criteria and found 6 research papers.

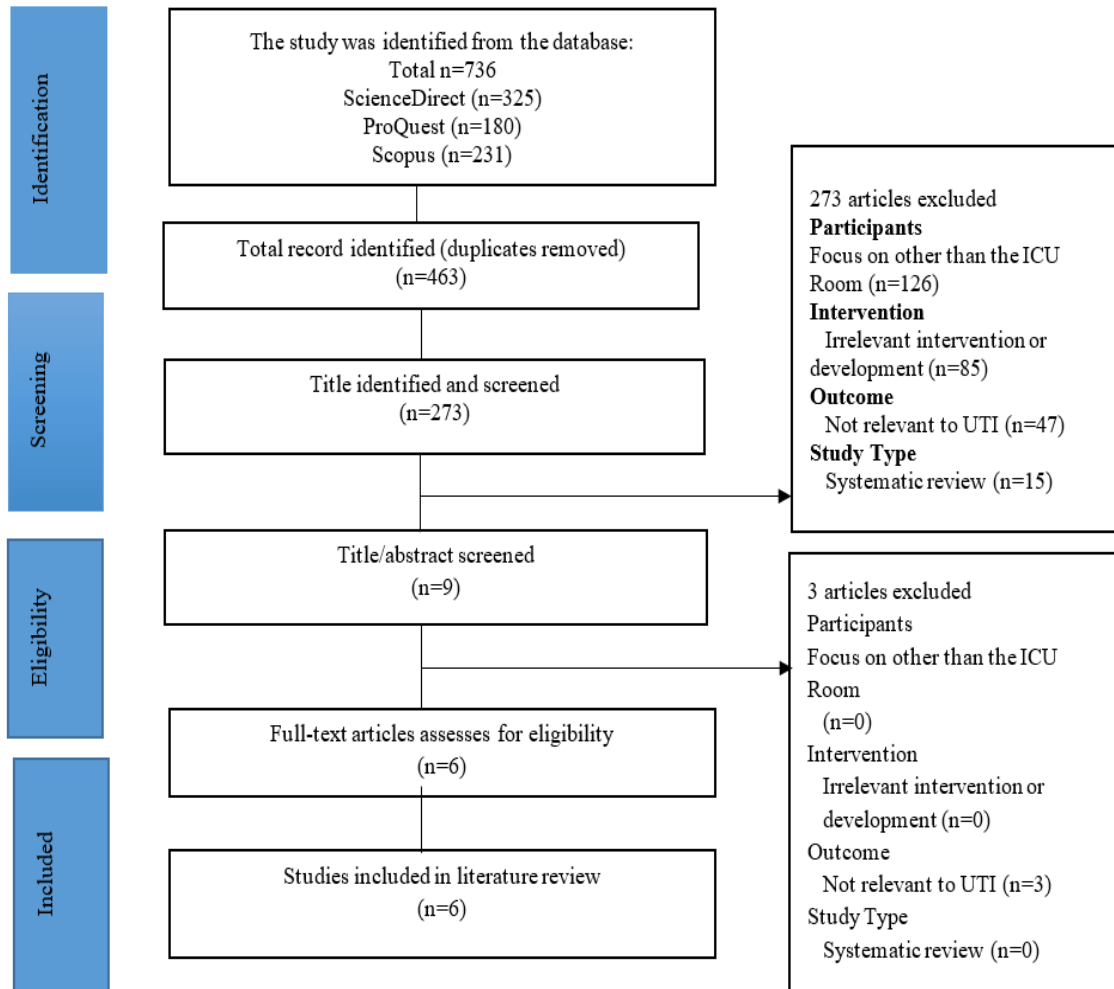

**Figure 1. Flowchart for PRISMA**

Tabel 1. Search results for articles on preventing urinary tract infections in the ICU

| No | Title<br>(researcher,<br>year)                                                                                                                                                                       | Research<br>Design                                                     | Sample                                                                                                    | Intervention                                                                                                                                                                          | Research Result                                                                                                                                                                                                              |
|----|------------------------------------------------------------------------------------------------------------------------------------------------------------------------------------------------------|------------------------------------------------------------------------|-----------------------------------------------------------------------------------------------------------|---------------------------------------------------------------------------------------------------------------------------------------------------------------------------------------|------------------------------------------------------------------------------------------------------------------------------------------------------------------------------------------------------------------------------|
| 1  | Prevention of urinary tract infection using a silver alloy hydrogel-coated catheter in critically ill patients: A single-center prospective randomized controlled study (Menglong Zhao, et.al, 2023) | Arranged, single-center, single-blind, randomized, controlled consider | A add up to of 132 patients required long-term catheterization within the seriously care unit.            | Inside the genuinely care unit think almost, pee tests were collected on days 3, 7, 10, and 14 after catheter consideration to choose the recurrence of urinary tract contaminations. | The foremost common microbes in understanding pee are Escherichia coli and Pseudomonas aeruginosa.                                                                                                                           |
| 2  | Chlorhexidine versus saline in reducing the risk of catheter associated urinary tract infection: A cost-effectiveness analysis (Brett G. Mitchell,2019)                                              | cost-effectiveness study                                               | The consider included 1,642 members, 697 within the control group and 945 within the intercession gather. | Use of 0.1% chlorhexidine versus saline to cleanse meat before inserting a urinary catheter.                                                                                          | By changing healthcare costs by trading from saline to chlorhexidine 0.1% per 100,000 catheter medicines, clinics will save AUD 387,909 per 100,000 catheter solutions, expecting 70 catheter-related urinary tract maladies |
| 3  | Cluster analysis identifies patients at risk of catheter-associated urinary tract infections in intensive care units: findings from the SPIN-UTI Network                                             | Study design and data collection                                       | 9,656 patients taken an interest in Italian extend to screen nosocomial diseases in seriously care units  | identify patients at risk of CAUTI                                                                                                                                                    | Patients in cluster 1 had the next frequency of CAUTI (3.5 per 100 patients) compared with patients within the other two clusters (2.5 per 100 patients in both clusters; P = 0.033).                                        |
| 4  | Impact of Implementing Key                                                                                                                                                                           | Retrospective analytical                                               | thirty-four patients with CAUTI                                                                           | Result measures were 1) rate of CAUTI evasion                                                                                                                                         | This think about found compliance with CAUTI                                                                                                                                                                                 |

| No | Title<br>(researcher,<br>year)                                                                                                                                                                                    | Research<br>Design            | Sample                          | Intervention                                                                                                                                                                                                                                                           | Research Result                                                                                                                                                                                                                                                                                                                                                                                                              |
|----|-------------------------------------------------------------------------------------------------------------------------------------------------------------------------------------------------------------------|-------------------------------|---------------------------------|------------------------------------------------------------------------------------------------------------------------------------------------------------------------------------------------------------------------------------------------------------------------|------------------------------------------------------------------------------------------------------------------------------------------------------------------------------------------------------------------------------------------------------------------------------------------------------------------------------------------------------------------------------------------------------------------------------|
|    | Performance Indicators on Catheter-Associated Urinary Tract Infection (CAUTI) Rates Among Adult ICU Patients in Saudi Arabia (Nouf Alhabdan, Asma Alyaemni, Mohammed M Aljuaid, Ali Baydoun & Samer Hamidi, 2023) | study                         |                                 | sharpen execution markers (KPIs) measured by CAUTI a few time as of late and after utilization, and 2) 4,444 common information records, utilization sharpens, and catheter-associated urinary tract illnesses in three zones: It was to expect ailment. Back sharpens | anticipation with respect to the documentation of common persistent information (72%), 50 percent of support operations and 52 percent of inclusion exercises. All things considered, a number of security conventions, counting lacking cleanliness and security benchmarks, understanding taking care of, and reviewed conventions, were not thoroughly followed to, which raised the chance variables related with CAUTI. |
| 5  | Prevention and management catheter-associated urinary tract infection in intensive care unit                                                                                                                      | A narrative review of studies | Of the 150 English publications | For each study, quality evaluation, data extraction, and analysis were carried out                                                                                                                                                                                     | Urinary catheter predominance (32.2%) is emphatically connected with the predominance of urinary tract diseases in seriously care units. There are rules accessible with point by point counsel. for the location and avoidance of healthcare-associated                                                                                                                                                                     |

| No | Title<br>(researcher,<br>year)                                                                                                                                                                                                                                                 | Research<br>Design    | Sample     | Intervention                                                 | Research Result                                                                                                                                                                                                                                                                                                                                                                                     |
|----|--------------------------------------------------------------------------------------------------------------------------------------------------------------------------------------------------------------------------------------------------------------------------------|-----------------------|------------|--------------------------------------------------------------|-----------------------------------------------------------------------------------------------------------------------------------------------------------------------------------------------------------------------------------------------------------------------------------------------------------------------------------------------------------------------------------------------------|
| 6  | Work experience was associated with the knowledge and practice of catheter-associated urinary tract infection prevention among nurses at University of Gondar Comprehensive Specialized Hospital, northwest Ethiopia, 2021 (Zegeye, A.F., Kassahun, C.W. & Temachu, Y.Z, 2023) | cross sectional study | 423 nurses | Data were collected by using self-administered questionnaire | diseases in CAUTI. Nursing staff's adequate information and hone with respect to CAUTI avoidance were 37.7% and 51.8%, respectively. Superior information was essentially connected with 95%, work encounter 95% , and work unit 95%, related, preparing 95%, rules 95%. Great hones were related with sexual orientation, proficient involvement, demeanors and information with respect to CAUTI. |

## Results and Discussion

### 1. Catheter-Associated Urinary Tract Contamination Avoidance Program

Programs to prevent urinary tract infections include limited use of urinary catheters, placing catheters in sterile environments, and promoting a closed seepage framework (Laurie J. Conway, 2012). The most effective prevention technique is to avoid unnecessary catheter insertion and remove the catheter as soon as it is practical (Tenke et al., 2017). According to Fink et al. (Fink et al., 2012), precautions include wearing gloves, cleaning your hands frequently, keeping your PPE sterile, providing daily urinary tract care, teaching new caregivers aseptic procedures and precautions, documenting everything you do, and conducting routine monitoring.

In order to prevent and control urinary tract infections, it is important to use the right catheters, have them installed by trained personnel using aseptic techniques and sterile equipment, and maintain good urinary catheters with a closed, sterile drainage system to prevent obstructions in urine flow (Meddings et al., 2014). It is advised that patients receive care using aseptic technique as a standard. In order to adopt suitable risk mitigation strategies, prevention programs and risk factors need to be assessed. According to Ling et al. (Ling et al., 2023), risks considered included the placement of urinary catheters without necessity, placing them for an extended period of time, maintaining aseptic technique during catheter placement and maintenance, failing closed drainage systems, obstructing urine flow, and placing catheters poorly. The following are suggestions for preventing UTIs: (1) Provides personnel with knowledge of the etiology and risk factors for infection.

Programs to prevent CAUTIs are designed to reduce unnecessary catheter setup and shorten catheter usage times. Additionally, it's made to make sure you adhere to his CAUTI prevention program, which consists of the following: (1) staff available for training in insertion and withdrawal techniques and treatment procedures; (2) highly qualified and experienced personnel present; (3) sterile equipment available for catheter installation and maintenance; (4) CAUTI screening programs set up to reduce unnecessary catheter use and minimize catheter course of action; (5) instructions for catheter placement; (6) personnel trained in use and result monitoring; and (7) monitoring implementation (Ling et al., 2023). Suggestions for the creation of CAUTI prevention initiatives.

## **2. Surveilans**

One way to prevent infections is to keep an eye on urinary tract infections linked to health issues (Bagchi et al., 2020). Longer catheterizations, hospital stays, and ICU stays put patients at risk for infection and necessitate closer observation (Talaat et al., 2010). Regulations and risk-based assessments are used in healthcare settings to monitor urinary tract infections. CAUTI Monitoring Suggestions: (1) employing conventional techniques; (2) it is not advised to routinely screen catheter-using individuals for the occurrence of asymptomatic bacteriuria. (3) Give clinical nursing personnel and nursing staff feedback when you are monitoring. (4) Notify the treating and supervising physicians of the monitoring outcomes (Ling et al., 2023).

## **3. Carry out control of catheter-related urinary tract contamination**

The success of preventing urinary tract infections in healthcare is a result of improvements in the quality of care that lessen the risk of infection. If all interdisciplinary teams collaborate and employ the PDSA technique to identify and address issues, programs can be implemented successfully (Ling et al., 2023). Strong clinical implementation and assessment procedures that prioritize patient safety lead to much better patient experiences and health outcomes. The basis for ongoing progress is the provision of data on urinary tract infections (CAUTI) (Parker et al., 2017). Patient safety can be enhanced by clinical practice through implementation and evaluation. It is anticipated that this will have a major positive impact on patient outcomes and healthcare experiences. Establishing baseline data will serve as a basis for guaranteeing ongoing enhancement and standardizing best practices.

## Conclusion

Review of the literature with a focus on intervention trials that try to lower UTIs caused by urinary catheter implantation. This study can demonstrate how better knowledge of monitoring and infection prevention and control initiatives will enhance patient safety.

## Bibliography

- Bagchi, S., Watkins, J., Norrick, B., Scalise, E., Pollock, D. A., & Allen-Bridson, K. (2020). Accuracy of catheter-associated urinary tract infections reported to the National Healthcare Safety Network, January 2010 through July 2018. *American Journal of Infection Control*, 48(2), 207–211. <https://doi.org/10.1016/j.ajic.2019.06.006>
- Birgitta Hovelius, P.-A. M. (1984). Article Navigation JOURNAL ARTICLE Staphylococcus saprophyticus as a Common Cause of Urinary Tract Infections. *Clinical Infection Diseases*, 6(3), 328–337. <https://doi.org/https://doi.org/10.1093/clinids/6.3.328>
- F.M.E. Wagenlehner, E. Loibl, H. Vogel, K. G. N. (2006). Incidence of nosocomial urinary tract infections on a surgical intensive care unit and implications for management. *International Journal of Antimicrobial Agents*, 28(1), 86–90. <https://doi.org/https://doi.org/10.1016/j.ijantimicag.2006.05.011>
- Fink, R., Gilmartin, H., Richard, A., Capezuti, E., Boltz, M., & Wald, H. (2012). Indwelling urinary catheter management and catheter-associated urinary tract infection prevention practices in Nurses Improving Care for Healthsystem Elders hospitals. *American Journal of Infection Control*, 40(8), 715–720. <https://doi.org/https://doi.org/10.1016/j.ajic.2011.09.017>
- Laurie J. Conway, E. L. L. (2012). Guidelines to prevent catheter-associated urinary tract infection: 1980 to 2010. *Heart & Lung*, 41(3), 271–283.



<https://doi.org/https://doi.org/10.1016/j.hrtlng.2011.08.001>.

- Leone, M., Garnier, F., Avidan, M., & Martin, C. (2004). Catheter-associated urinary tract infections in intensive care units. *Microbes and Infection*, 6(11), 1026–1032. <https://doi.org/https://doi.org/10.1016/j.micinf.2004.05.016>
- Ling, M. L., Ching, P., Apisarnthanarak, A., Jaggi, N., Harrington, G., & Fong, S. M. (2023). APSIC guide for prevention of catheter associated urinary tract infections (CAUTIs). *Antimicrobial Resistance and Infection Control*, 12(1), 1–5. <https://doi.org/10.1186/s13756-023-01254-8>
- Meddings, J., Rogers, M. A. M., Krein, S. L., Fakhri, M. G., Olmsted, R. N., & Saint, S. (2014). Reducing unnecessary urinary Catheter use and other strategies to prevent catheter-associated urinary tract infection: An integrative review. *BMJ Quality and Safety*, 23(4), 277–289. <https://doi.org/10.1136/bmjqs-2012-001774>
- Parker, V., Giles, M., Graham, L., Suthers, B., Watts, W., O'Brien, T., & Searles, A. (2017). Avoiding inappropriate urinary catheter use and catheter-associated urinary tract infection (CAUTI): a pre-post control intervention study. *BMC Health Services Research*, 17(1), 1–9. <https://doi.org/10.1186/s12913-017-2268-2>
- Talaat, M., Hafez, S., Saied, T., Elfeky, R., El-Shoubary, W., & Pimentel, G. (2010). Surveillance of catheter-associated urinary tract infection in 4 intensive care units at Alexandria university hospitals in Egypt. *American Journal of Infection Control*, 38(3), 222–228. <https://doi.org/https://doi.org/10.1016/j.ajic.2009.06.011>
- Tenke, P., Mezei, T., Böde, I., & Köves, B. (2017). Catheter-associated Urinary Tract Infections. *European Urology, Supplements*, 16(4), 138–143. <https://doi.org/10.1016/j.eursup.2016.10.001>
- Wanat, M., Borek, A. J., Atkins, L., Sallis, A., Ashiru-Oredope, D., Beech, E., Butler, C. C., Chadborn, T., Hopkins, S., Jones, L., McNulty, C. A. M., Roberts, N., Shaw, K., Taborn, E., & Tonkin-crine, S. (2020). Optimising interventions for catheter-associated urinary tract infections (Cauti) in primary, secondary and care home settings. *Antibiotics*, 9(7), 1–13. <https://doi.org/10.3390/antibiotics9070419>
